# Supplementary material for: Shallow Sea Gas Manifestations in the Aegean Sea (Greece) as Natural Analogs to Study Ocean Acidification: First Catalog and Geochemical Characterization
Source: Frontiers journal article supplement (doi:10.3389/fmars.2021.775247), 2022-01-31
Supplement: Table_2.XLSX [file Table_2.XLSX]

## Sheet: Paleochori_Milos
Site	Date	Sector	Latitude	Longitute	Altitude	type	pH	T
								oC
Paleochori	2013-06-08 11:19:00	35 S	278127	4061696	0	seawater	7.55	24.1
Paleochori	2013-06-08 11:21:00	35 S	278138	4061697	0	seawater	7.76	23.4
Paleochori	2013-06-08 11:22:00	35 S	278148	4061696	0	seawater	7.96	23.1
Paleochori	2013-06-08 11:24:00	35 S	278164	4061695	0	seawater	7.95	23
Paleochori	2013-06-08 11:25:00	35 S	278172	4061693	0	seawater	7.93	23.1
Paleochori	2013-06-08 11:27:00	35 S	278191	4061692	0	seawater	7.99	22.5
Paleochori	2013-06-08 11:28:00	35 S	278216	4061690	0	seawater	7.98	22.8
Paleochori	2013-06-08 12:51:00	35 S	278120	4061698	0	seawater	7.41	24.1
Paleochori	2013-06-08 12:53:00	35 S	278114	4061697	0	seawater	7.43	24.7
Paleochori	2013-06-08 12:53:00	35 S	278109	4061696	0	seawater	7.65	24.2
Paleochori	2013-06-08 12:54:00	35 S	278097	4061695	0	seawater	7.79	23.3
Paleochori	2013-06-08 12:55:00	35 S	278085	4061695	0	seawater	7.76	23.2
Paleochori	2013-06-08 12:55:00	35 S	278077	4061694	0	seawater	7.95	23
Paleochori	2013-06-08 12:56:00	35 S	278063	4061690	0	seawater	7.98	22.9
Paleochori	2013-06-08 12:57:00	35 S	278050	4061688	0	seawater	7.98	23
Paleochori	2013-06-08 12:58:00	35 S	278048	4061685	0	seawater	8.01	22.7
Paleochori	2013-06-08 13:02:00	35 S	278119	4061703	0	seawater	7.21	24.6
Palechori cave	2013-06-08 13:36:00	35 S	277789	4061612	1	underwater spring	2.85	75.3

## Sheet: DEH_Milos
Site	Date	Sector	Latitude	Longitute	Altitude	type	pH	T
								oC
DEH	2009-06-09 19:03:00	35 S	274019	4065228	0	seawater	6.08	24.9
DEH	2009-06-09 19:04:00	35 S	274019	4065232	0	seawater	5.93	25.2
DEH	2009-06-09 19:04:00	35 S	274019	4065234	0	seawater	6.08	24.3
DEH	2009-06-09 19:05:00	35 S	274019	4065242	0	seawater	6.21	24.1
DEH	2009-06-09 19:05:00	35 S	274021	4065252	0	seawater	7.2	24
DEH	2009-06-09 19:06:00	35 S	274021	4065263	0	seawater	7.48	23.7
DEH	2009-06-09 19:06:00	35 S	274021	4065275	0	seawater	7.77	23.8
DEH	2009-06-09 19:07:00	35 S	274020	4065287	0	seawater	7.84	23.2
DEH	2009-06-09 19:09:00	35 S	274020	4065234	0	seawater	4.97	52.3
DEH	2009-06-09 19:10:00	35 S	274017	4065216	0	seawater	6.19	26.2
DEH	2009-06-09 19:11:00	35 S	274021	4065206	0	seawater	7.25	23.4
DEH	2009-06-09 19:12:00	35 S	274024	4065198	0	seawater	7.13	23.2
DEH	2009-06-09 19:13:00	35 S	274023	4065176	0	seawater	7.07	24.2
DEH	2009-06-09 19:15:00	35 S	274022	4065140	0	seawater	7.71	22.9
DEH	2009-06-09 19:22:00	35 S	273429	4066353	0	seawater	8.28	22.3

## Sheet: Ilion_Euboea
Site	Date	Sector	Latitude	Longitute	Altitude	pH
					oC
Ilion	2011-10-03 10:05:00	34 S	684623	4302386	3	5.79
Ilion	2011-10-03 11:37:00	34 S	684808	4302537	2	6.68
Ilion	2011-10-03 11:39:00	34 S	684802	4302534	2	6.88
Ilion	2011-10-03 11:39:00	34 S	684796	4302532	2	7.03
Ilion	2011-10-03 11:40:00	34 S	684789	4302528	2	7.15
Ilion	2011-10-03 11:43:00	34 S	684777	4302521	2	7.12
Ilion	2011-10-03 11:44:00	34 S	684771	4302517	4	7.03
Ilion	2011-10-03 11:46:00	34 S	684766	4302513	3	7.25
Ilion	2011-10-03 11:46:00	34 S	684760	4302509	2	7.37
Ilion	2011-10-03 11:47:00	34 S	684756	4302506	4	7.74
Ilion	2011-10-03 11:48:00	34 S	684751	4302502	3	7.29
Ilion	2011-10-03 11:49:00	34 S	684743	4302496	3	7.03
Ilion	2011-10-03 11:50:00	34 S	684740	4302492	3	7.16
Ilion	2011-10-03 11:51:00	34 S	684732	4302486	4	7.23
Ilion	2011-10-03 11:52:00	34 S	684726	4302481	3	7.09
Ilion	2011-10-03 11:53:00	34 S	684719	4302475	4	7.29
Ilion	2011-10-03 11:54:00	34 S	684715	4302470	5	7.81
Ilion	2011-10-03 11:56:00	34 S	684704	4302463	5	7.79
Ilion	2011-10-03 11:58:00	34 S	684700	4302454	4	7.82
Ilion	2011-10-03 11:59:00	34 S	684692	4302449	4	7.97
Ilion	2011-10-03 12:00:00	34 S	684684	4302442	4	7.98
Ilion	2011-10-03 12:01:00	34 S	684674	4302434	4	8.05
Ilion	2011-10-03 12:02:00	34 S	684663	4302425	4	8.08
Ilion	2011-10-03 12:03:00	34 S	684652	4302416	5	8.03
Ilion	2011-10-03 12:04:00	34 S	684641	4302405	4	8.07
Ilion	2011-10-03 12:05:00	34 S	684631	4302393	5	8.15
Ilion	2011-10-03 12:06:00	34 S	684622	4302384	5	8.17
Ilion	2011-10-03 12:07:00	34 S	684612	4302373	6	8.16
Ilion	2011-10-03 12:08:00	34 S	684600	4302361	5	8.2
Ilion	2011-10-03 12:08:00	34 S	684589	4302350	5	8.19
Ilion	2011-10-03 12:10:00	34 S	684571	4302344	6	8.6
Ilion	2011-10-03 12:11:00	34 S	684548	4302316	6	8.19

## Sheet: Therma_Kos
Description	type	Date	Sector	Latitude	Longitute	Altitude	pH	T
								oC
Therma	bubbling gas	2017-10-14 10:54:00	35 S	528211	4077692	0	5.87	45.6
Therma	sea water	2017-10-14 13:03:00	35 S	528095	4077642	6	7.92	23
Therma	sea water	2017-10-14 13:04:00	35 S	528101	4077643	5	7.17	22.8
Therma	sea water	2017-10-14 13:05:00	35 S	528106	4077644	5	6.62	26
Therma	sea water	2017-10-14 13:06:00	35 S	528112	4077647	7	6.69	22.3
Therma	sea water	2017-10-14 13:09:00	35 S	528118	4077652	6	6.58	23.1
Therma	sea water	2017-10-14 13:09:00	35 S	528128	4077655	4	6.72	22.5
Therma	sea water	2017-10-14 13:13:00	35 S	528130	4077664	5	6.67	22.8
Therma	sea water	2017-10-14 13:14:00	35 S	528137	4077669	5	6.47	25.9
Therma	sea water	2017-10-14 13:16:00	35 S	528144	4077669	5	6.57	24.7
Therma	sea water	2017-10-14 13:19:00	35 S	528151	4077671	7	6.53	25.6
Therma	sea water	2017-10-14 13:22:00	35 S	528152	4077665	4	6.8	22.2
Therma	sea water	2017-10-14 13:23:00	35 S	528156	4077677	6	6.51	28
Therma	sea water	2017-10-14 13:25:00	35 S	528155	4077670	6	6.07	43.7
Therma	sea water	2017-10-14 13:27:00	35 S	528168	4077672	7	7.01	24.3
Therma	sea water	2017-10-14 13:27:00	35 S	528176	4077674	6	6.95	24
Therma	sea water	2017-10-14 13:29:00	35 S	528190	4077671	8	6.85	23.6
Therma	sea water	2017-10-14 13:30:00	35 S	528204	4077672	5	6.81	23.1
Therma	sea water	2017-10-14 13:40:00	35 S	528226	4077676	3	6.06	43.4
Therma	sea water	2017-10-14 13:41:00	35 S	528232	4077682	4	6.75	24.6
Therma	sea water	2017-10-14 13:42:00	35 S	528242	4077681	3	6.82	23.8
Therma	sea water	2017-10-14 13:43:00	35 S	528254	4077682	5	6.89	22.3
Therma	sea water	2017-10-14 13:44:00	35 S	528267	4077679	4	6.8	23.2
Therma	sea water	2017-10-14 13:45:00	35 S	528275	4077678	4	6.77	22.7
Therma	sea water	2017-10-14 13:47:00	35 S	528287	4077680	3	6.63	23.8
Therma	sea water	2017-10-14 13:48:00	35 S	528301	4077680	3	6.7	23
Therma	sea water	2017-10-14 13:50:00	35 S	528311	4077681	3	6.53	26.3
Therma	sea water	2017-10-14 13:51:00	35 S	528324	4077678	5	6.82	23.2
Therma	sea water	2017-10-14 13:53:00	35 S	528346	4077682	3	6.72	23.8
Therma	sea water	2017-10-14 13:56:00	35 S	528373	4077679	5	6.74	23.3
Therma	sea water	2017-10-14 13:57:00	35 S	528402	4077674	4	6.74	22.9
Therma	sea water	2017-10-14 13:59:00	35 S	528419	4077674	5	6.65	22.3
Therma	sea water	2017-10-14 14:00:00	35 S	528444	4077672	4	6.82	22.3
Therma	sea water	2017-10-14 14:25:00	35 S	528488	4077692	3	7.14	22.1
